# Supplementary material for: Self-assembly of reduced graphene oxide at liquid–air interface for organic field-effect transistors
Source: Royal Society of Chemistry journal article supplement (doi:10.1039/c2jm16232f), 2012-01-01
Supplement: c2jm16232f.pdf [file c2jm16232f.pdf]

## Self-Assembly of Reduced Graphene Oxide at Liquid-Air Interface for Organic Field-Effect Transistors

By Shendong Ren, Rongjin Li, Xiangjian Meng and Hongxiang Li\*

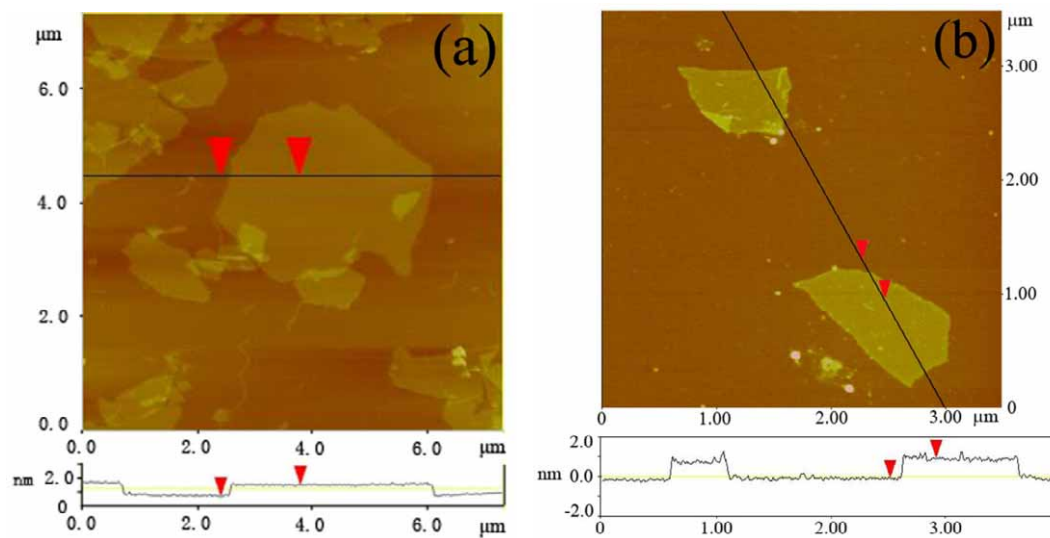

Fig. S1 AFM images of (a) GO and (b) RGO

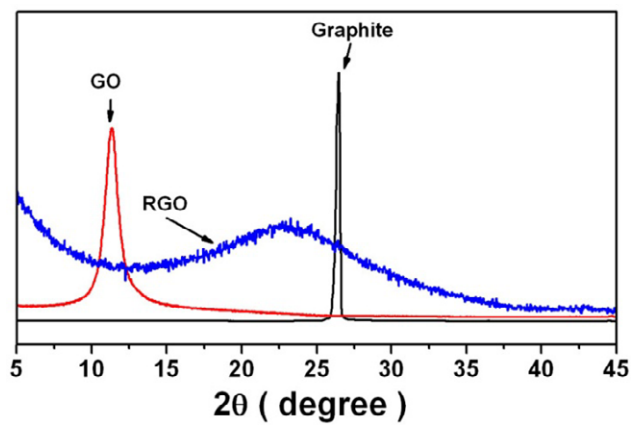

Fig. S2 XRD patterns of graphite, GO and RGO.

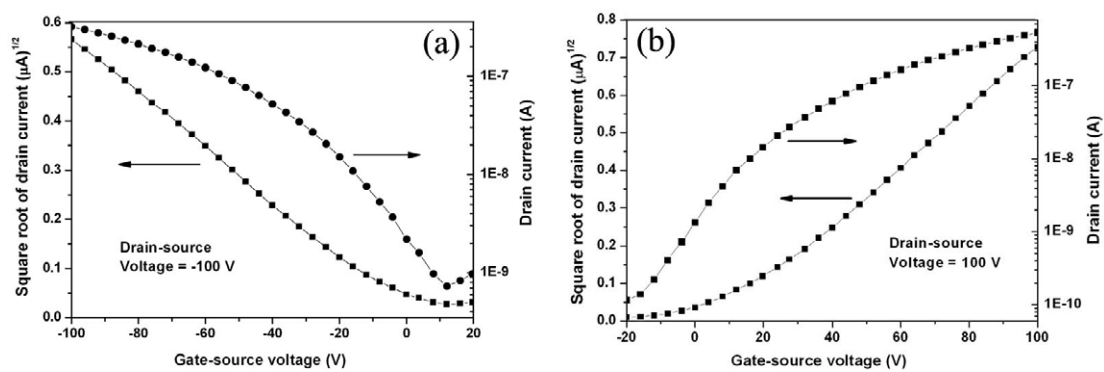

**Fig. S3** Transfer characteristics of (a) CuPc based device and (b) F<sub>16</sub>CuPc based device respectively with Au S/D electrode.

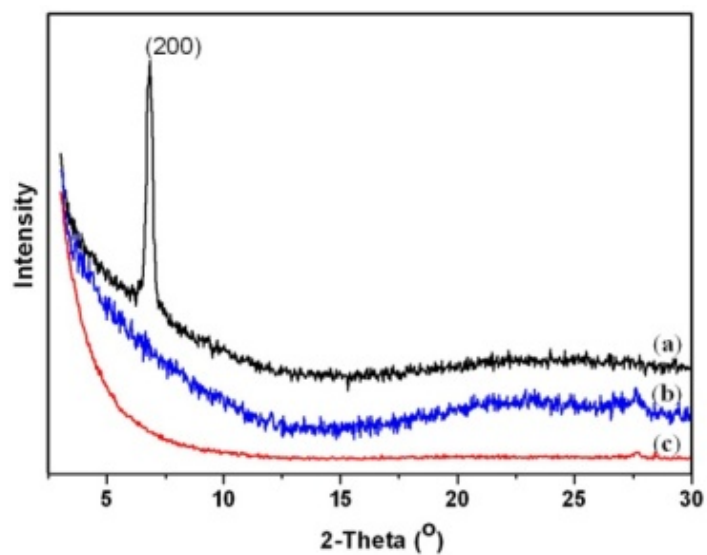

**Fig. S4** XRD scattering patterns of the CuPc thin film on (a) SiO<sub>2</sub> dielectric, (b) RGO film, (c) gold film.
